# Supplementary material
Source: PubMed Central journal article supplement (PMC3197375)
Supplement: suppmat.pdf [file suppmat.pdf]

1  
2  
3  
4  
5  
6  
7  
8  
9  
10

**SUPPLEMENTAL MATERIAL**

**Mechanisms of atrial-selective block of sodium channel by ranolazine  
II. Insights from a mathematical model**

Vladislav V. Nesterenko,<sup>1</sup> Andrew C. Zygmunt,<sup>1</sup> Sridharan Rajamani,<sup>2</sup> Luiz Belardinelli,<sup>2</sup> Charles  
Antzelevitch <sup>1</sup>

<sup>1</sup>Masonic Medical Research Laboratory, Utica, NY

<sup>2</sup>Gilead Sciences, Palo Alto, CA

11

## Methods

12 **Reduction of the complete sodium channel activation scheme to the 3-states model.**

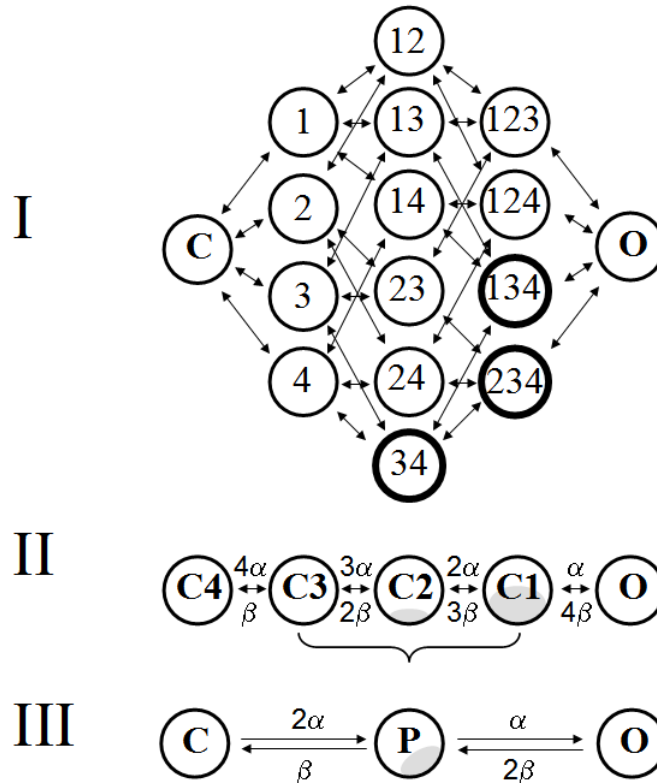

13  
14

15 **Supplemental Figure 1.** Reduction of a complete Markov chain model for sodium channel activation (I)  
16 to a standard Markov chain model for indistinguishable gates (II) to the minimal Markov chain model for  
17 activation gating (III). Numbers on scheme I indicate which activation gate(s) are open in each state. The  
18 total number of “pre-open” states in scheme I is 14, only 3 states have both activation gates 3 (DIII) and 4  
19 (DIV) in open position (indicated by thick circles). In schemes II and III the fractions of states C2, C1 and  
20 P available for interaction with ranolazine are marked with a gray color to emphasize the fact that only a  
21 fraction  $\delta$  of these states should be used when calculating ranolazine binding to the pre-open state P.  
22

23 The complete model I (Supplemental Figure 1) must be used when all four activation  
24 gates have different kinetics (3, 4) or when only certain channel states permit interaction with  
25 a blocker. (17) However, such schemes require assignment of kinetic rates for drug interaction  
26 with all the channel states, which cannot be obtained experimentally. Given these limitations, we  
27 reduced the complex multi-state model to a simpler equivalent version. When all gates are  
28 identical, the complete scheme I can be reduced to the less complex scheme II, which is widely  
29 used to describe normal and modified sodium channel kinetics. (2, 6) However, neither the  
30 distribution of the channels between states C3, C2, and C1, nor the kinetics of drug interaction  
31 with each of these states can be obtained experimentally. For this reason we further reduced  
32 the activation model by combining three transient closed states (C3, C2, and C1) into a single  
33 pre-open state P, and introduce a parameter  $\delta$ , which indicates a fraction of the pre-open state  
34 P, which is able to interact with a blocker (scheme III). Such a scheme is mathematically  
35 equivalent to the more complex schemes I and II and can be used for qualitative simulations of  
36 drug interaction with the sodium channel. Channel kinetic rates  $\alpha$  &  $\beta$  in scheme III were  
37 adjusted to obtain realistic sodium channel activation parameters and sigmoid (second power)  
38 activation time course.

39  
40  
41

**Normal sodium channel gating**

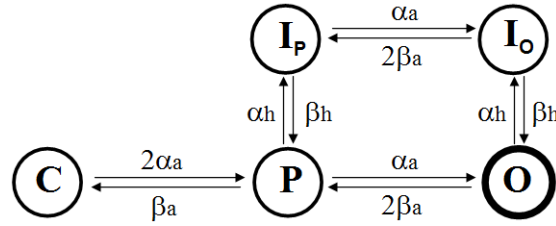

42  
43

**Supplemental Figure 2.** The kinetic Markovian model for normal sodium channel gating. State **C** is a fully closed state, state **O** is a fully conducting state, and state **P** represents “pooled” pre-open states

46

The kinetic Markovian model of sodium channel gating developed in this study contains only five channel states (Figure 2). Here **C** denotes a fully closed state when all activation gates are in closed position. **P** is an aggregate of pre-open states, which combines all states with at least one, but not all activation gate in open position. **O** is an open state when all activation gates are in open position and channel is conducting ionic current. Activation/deactivation transitions  $C \Leftrightarrow P \Leftrightarrow O$  were simplified as if there were only two activation gates. The inactivation process is assumed to be coupled with activation and does not start unless at least one activation gate is open. (5, 17) Thus, the rate of inactivation depends on the fraction of channels in states **P** and **O** at any given potential. In addition, inactivation/recovery rates  $\alpha_h$  and  $\beta_h$  have intrinsic voltage dependence. Consequently, this scheme shows inactivated states **Ip** and **Io**, but the close-inactivated state **Ic** is absent. This model is able to reproduce all essential features of normal channel gating, including activation and inactivation time constants and steady-state parameters observed experimentally.

59

**Steady-state activation and activation rate ( $ms^{-1}$ ) for the fast and slow (late)  $I_{Na}$ .**

62

$$a_{\infty}(V) = \frac{1}{1 + \exp\left(-\frac{V - V_a}{4.6}\right)} \quad (1)$$

63

$$p_{\infty}(V) = \sqrt{a_{\infty}(V)} \quad (2)$$

64

$$\tau_a = \frac{0.25}{\exp\left(-\frac{V - V_a}{20}\right) + \exp\left(\frac{V - V_a}{12}\right)} + 0.0075 \quad (3)$$

65

$$\alpha_a(V) = \frac{p_{\infty}(V)}{\tau_a(V)} \quad (4)$$

66

$$\beta_a(V) = \frac{1 - p_{\infty}(V)}{\tau_a(V)} \quad (5)$$

67

Rates of activation  $\alpha_a(V)$  and deactivation  $\beta_a(V)$  were defined via the steady-state activation curve  $a_{\infty}(V)$  and activation time constant  $\tau_a(V)$ . As is evident from the scheme on

68

69 Figure 1, the model assumes a two-step process of activation ( $C \Rightarrow P \Rightarrow O$ ) as if there were  
 70 only two gates. This assumption results in voltage dependence for the pooled pre-open state P,  
 71 i.e.  $p_{\infty}(V)$ , to be a square root of the steady-state activation curve  $a_{\infty}(V)$ .

72 Voltage of the half activation at steady-state was set to  $V_a = -41$  mV for the ventricular  
 73 sodium current and  $V_a = -47$  mV for the atrial sodium current in agreement with our  
 74 experimental observations.

75

76 **Steady-state inactivation and inactivation rate ( $\text{ms}^{-1}$ ) for the fast  $I_{\text{Na}}$  at 15°C.**

77 
$$\text{HH}(V) = \exp\left(\frac{V - V_h}{6.5}\right) \quad (6)$$

78 
$$h_{\infty}(V) = \frac{1}{1 + \text{HH}(V)} \quad (7)$$

79 
$$\tau_h(V) = \frac{25}{\exp\left(-\frac{V - V_h - 10}{30}\right) + \exp\left(\frac{V - V_h - 10}{12}\right)} + 0.75 \quad (8)$$

80 
$$\alpha_h(V) = \frac{1 - h_{\infty}(V)}{\tau_h(V)} \quad (9)$$

81 
$$\beta_h(V) = \frac{h_{\infty}(V)}{\tau_h(V)} \quad (10)$$

82 Voltage of the half intrinsic inactivation (property of inactivation gates without taking  
 83 activation into account) voltage was set to  $V_h = -85$  mV for the ventricular sodium current and  
 84  $V_h = -100$  mV for the atrial sodium current. Note, that the observable steady-state inactivation  
 85 curves, as can be obtained using standard experimental protocols, are different from those  
 86 given by these expressions for intrinsic inactivation, as described below.

87 The steady-state probability to find a channel in pre-open state P at negative potentials  
 88 below activation threshold, i.e. the probability that any one activation gate is open, but channel  
 89 is not yet conducting is given by

90 
$$P_{\infty}(V) = 2 \cdot p_{\infty}(V) - a_{\infty}(V) \quad (11)$$

91 Using this expression, the voltage-dependence of the observable steady-state  
 92 inactivation can be calculated as:

93 
$$h_{\infty\text{obs}}(V) = \frac{1}{1 + P_{\infty}(V) \cdot \text{HH}(V)} \quad (12)$$

94 where  $P_{\infty}(V)$  is defined in eq.(11) and  $\text{HH}(V)$  is defined in eq.(6)

95 Note, that this observable steady-state inactivation curve depends on channel activation  
 96 and is shifted significantly to the right (more positive potentials) as compared with the intrinsic  
 97 steady-state inactivation  $h_{\infty}(V)$ .

98 The model also predicts that the time constant for inactivation and recovery as observed  
 99 using standard experimental protocols will differ from its intrinsic voltage dependence and can  
 100 be expressed as:

101 
$$\tau_h(V) = \frac{1}{\alpha_h(V) \cdot P_{\infty}(V) + \beta_h(V)} \quad (13)$$

102 This expression is accurate for all voltages below activation threshold between -140 and  
 103 -60 mV.

104  
 105 **Inactivation rate (ms<sup>-1</sup>) for the slow (late) I<sub>Na</sub> at 15°C.**

106 In order to simulate inactivation-deficient (slow or late) sodium current we decreased the  
 107 inactivation rate by the factor of 10 and removed the second exponential term (replaced by 1) to  
 108 keep the rate practically constant for voltages above -30 mV.

109 
$$\tau_h(V) = \frac{25 \cdot 10}{\exp\left(-\frac{V - V_h - 10}{30}\right) + 1} + 0.75 \quad (14)$$

110 With this modification, the simulated time constant for inactivation at -30 mV is ≈200 ms.  
 111 This value is in agreement with our data, obtained in canine left ventricular myocytes (120-220  
 112 ms), and with values, obtained by other investigators (100-500 ms). All other parameters of the  
 113 sodium channel gating remained the same.

114 This slowly inactivated state could be incorporated as an additional state in the sodium  
 115 channel model. However, it would require adding corresponding non-inactivated states and  
 116 would make the model unnecessarily complex. We chose to simulate the slow sodium current  
 117 as an independent current with the same activation rate and slow inactivation rate. This  
 118 approach permits direct comparison of model prediction with experimental data obtained using  
 119 an inactivation-deficient sodium channel. (25) This model can be applied to simulate ranolazine  
 120 block of the late component of the fast sodium current under the assumption that channels do  
 121 not recover from fast inactivation at depolarized potentials.

122  
 123 **Inactivation rate (ms<sup>-1</sup>) for the fast I<sub>Na</sub> at 37°C in voltage clamp conditions.**

124 Our voltage clamp experiments using canine left ventricular myocytes showed that the  
 125 inactivation time constant for the fast sodium current at -30 mV is equal to 1.33 ± 0.10 ms at  
 126 15°C and to 0.53 ± 0.07 ms at 37°C. The ratio of these time constants is about 2.5, which  
 127 corresponds to Q<sub>10</sub> = 1.5 and is within a range previously found for the sodium channel  
 128 inactivation. (8, 12) Therefore, for voltage-clamp simulations at 37°C we increased the rate of  
 129 inactivation 2.5 times for all voltages as shown below:

130 
$$\tau_h(V) = 0.4 \cdot \left( \frac{25}{\exp\left(-\frac{V - V_h - 10}{30}\right) + \exp\left(\frac{V - V_h - 10}{12}\right)} + 0.75 \right) \quad (15)$$

131  
 132 **Activation and inactivation rates (ms<sup>-1</sup>) for the fast sodium current at 37°C in**  
 133 **physiological conditions.**

134 Voltage dependences for steady-state activation, steady-state inactivation, and  
 135 activation time constants were shifted by 20 mV in a positive direction such that V<sub>a</sub> = -21 mV for  
 136 the ventricular sodium current, V<sub>a</sub> = -27 mV for the atrial sodium current, intrinsic V<sub>h</sub> = -65 mV  
 137 for the ventricular sodium current and V<sub>h</sub> = -80 mV for the atrial sodium current. (7) The rate of  
 138 inactivation was increased 2.5 fold as in the voltage clamp conditions.

139  
 140 **Sodium concentrations and maximal conductance of the sodium current.**

141 Sodium current traces were calculated using simulated open probability O(t) and  
 142 Goldman-Katz expression for the maximal channel conductance:

143 
$$I_{Na}(t) = \bar{P}_{Na} \cdot O(t) \cdot \left( z_{Na}^2 \times \frac{VF}{RT} \times \frac{\gamma_{Na,i} \cdot [Na]_i \cdot \exp(z_{Na} VF/RT) - \gamma_{Na,o} \cdot [Na]_o}{\exp(z_{Na} VF/RT) - 1} \right) \quad (16)$$

144 where  $[Na]_i = 5$  mmol/L and  $[Na]_o = 10$  mmol/L for voltage clamp simulations at 15°C and 37°C;  
 145 and  $[Na]_i = 10$  mmol/L and  $[Na]_o = 140$  mmol/L for AP clamp simulations at 37°C. Activities  $\gamma_{Na,i}$   
 146  $= \gamma_{Na,o} = 0.75$ . Value of the maximal permeability  $P_{Na}$  was adjusted to give realistic amplitudes of  
 147 the simulated current (in our simulations absolute value of the sodium current does not play any  
 148 role in ranolazine blockade).

149 Steady-state activation curves were obtained by dividing the peak of  $I_{Na}$  at different  
 150 voltages by the linear driving force ( $V_{step} - E_{Na}$ ) in agreement with the conventional analysis of  
 151 experimental data.

152 **Kinetics of ranolazine interaction with the sodium channel**

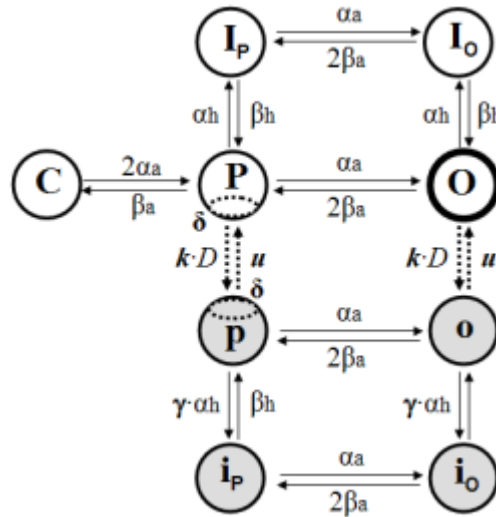

154 **Supplemental Figure 3.** Complete scheme of sodium channel gating and block by ranolazine. White  
 155 circles represent drug-free channel gating and grayed circles represent gating of the blocked channel.  
 156 Dotted arrows represent ranolazine binding/unbinding and solid arrows represent voltage-dependent  
 157 channel gating. Parameter  $\delta = 3/14$  indicates the fraction of pre-open states **P** and **p** that permit  
 158 ranolazine binding/unbinding. Factor  $\gamma = 5.0$  represents an increase of the intrinsic inactivation rate of the  
 159 blocked channels.  
 160  
 161

162 The model assumes that ranolazine interaction with its binding site does not depend on  
 163 the transmembrane potential or channel state. However, binding and unbinding of ranolazine to  
 164 this site via a hydrophilic pathway are modulated by both activation and inactivation gates. As  
 165 the scheme in Figure 3 shows, ranolazine access to the binding site is blocked when all four  
 166 activation gates are closed (no **C**  $\Rightarrow$  **c** transition). Moreover, ranolazine presence in the channel  
 167 prevents simultaneous closing of all four activation gates (no **p**  $\Rightarrow$  **c** transition) as explained  
 168 below. These two assumptions eliminate the closed-blocked state **c** and correspondingly the  
 169 closed-inactivated-blocked state **i<sub>c</sub>** from the scheme. We also assumed that closing of the  
 170 inactivation gate completely blocks the hydrophilic pathway to and from the binding site. As a  
 171 result, ranolazine cannot bind to the inactivated channel so that there is no inactivated-state  
 172 block. Ranolazine also cannot unbind from the channel when the inactivation gate closes after  
 173 binding occurs, trapping ranolazine inside the inactivated channel. This leaves the pre-open  
 174 state **P** and the fully open state **O** as the only states that provide a hydrophilic pathway for  
 175 ranolazine binding and unbinding. Ranolazine has full access to and from the binding site when  
 176 the channel is in the open state **O** or the open-blocked state **o**. However, it interacts with the

177 same kinetic rates only with a fraction  $\delta = 3/14$  of the aggregate pre-open states **P** and **p** as  
 178 detailed below.

179 Kinetic rates of ranolazine interaction with the binding site of the sodium channel were  
 180 assumed to be identical for atrial and ventricular sodium channels and were set  $k = 3 \mu\text{M}^{-1}\text{s}^{-1}$   
 181 and  $u = 6 \text{ s}^{-1}$  in agreement with experimentally calculated values (Table 1, the accompanying  
 182 paper).

183 The same kinetic rates were used to simulate ranolazine block of both fast and slow  
 184 sodium currents based on recent experimental evidence that the same sodium channel protein  
 185 ( $\text{Na}_v1.5$ ) is responsible for both sodium current components in canine and human  
 186 myocardium. (14, 15)

187  
 188 **Ranolazine prevents channel from being fully closed**

189 The 3D structure of the ranolazine molecule depends on the particular environment.  
 190 According to a NIH database (20) there are six different 3D structures that ranolazine can have  
 191 according to chemical modeling. There is no information about possible ranolazine structure  
 192 when it interacts with the sodium channel. If we assume that ranolazine acquires the most  
 193 elongated structure when interacting with the sodium channel, as shown on Figure 1 in the main  
 194 paper, then its length (22 Å) may span from the local anesthetic (LA) binding site to the site of  
 195 activation gate interactions. This will hamper normal interaction among activation gates and  
 196 prevent channel from becoming fully closed (all four gates closed) when ranolazine is bound to  
 197 the channel. However, it does not prevent any three activation gates from closing.  
 198 Correspondingly, the closed-blocked state **c** was eliminated from the kinetic scheme (Figure 1A  
 199 in the main paper).

200  
 201 **Ranolazine interaction with pre-open state.**

202 Ranolazine is an open state blocker and requires a hydrophilic pathway to reach the  
 203 binding site on the main  $\alpha$ -subunit. The model assumes that opening of two activation gates DIII  
 204 and DIV, which contain the LA binding site, is necessary to provide such a pathway. Therefore,  
 205 only a fraction  $\delta$  of the aggregate state **P** is accessible for ranolazine. This fraction corresponds  
 206 to all cases when both gates DIII and DIV are open, but at least one other gate is closed, and is  
 207 equal to  $3/14$  for a channel with four activation gates. Correspondingly, ranolazine cannot  
 208 unbind from the channel when one of these two gates (DIII and DIV) is closed. Therefore, in the  
 209 kinetic equation for ranolazine interaction with pre-open states **P** and **p**, only the fraction  $\delta$  of  
 210 each state is involved in interaction, effectively decreasing kinetic rates:

211 
$$\frac{dP}{dt} = -k_a(\delta \cdot P) + u_a \cdot (\delta \cdot p) = -\delta \cdot k_a \cdot P + \delta \cdot u_a \cdot p \quad (17)$$

212 Starmer at al. (23) observed that block acquired in the presence of lidocaine during a  
 213 train of 20-msec pulses to different potentials below activation threshold follows the same  
 214 voltage dependence as the probability to find a single activation gate open. Based on this  
 215 observation they proposed that lidocaine strongly interacts with a transient pre-open state (“non-  
 216 open state encountered in transitions between a rest potential to a depolarized potential” (23)).  
 217 However, in the case of lidocaine a slower interaction with the inactivated state of the channel  
 218 predominates in the overall block development because the sodium channel spends  
 219 significantly longer time in this state. Subsequently, Sheet & Hanck (18, 19) showed that  
 220 stabilization of voltage sensors of DIII and DIV in the open position effectively increases binding  
 221 rate of lidocaine block, presumably because activation gates DIII & DIV remain open with a  
 222 higher probability.

223  
 224 **Ranolazine immobilization of activation gates leads to faster intrinsic inactivation**

225 Ranolazine binding to the sodium channel and interference with the normal closing of  
 226 the activation gates may also increase probability for activation gates to stay in the open  
 227 position. Since we assumed that inactivation is coupled with activation, the opening of at least  
 228 one activation gate is required to expose the binding site for the inactivation gate, which is  
 229 necessary to complete the inactivation process. A higher probability for an activation gate to  
 230 stay in the open position when ranolazine is bound to the channel increases the probability that  
 231 the binding site for the inactivation gate will be exposed. This may lead to a faster kinetic rate of  
 232 the intrinsic inactivation that corresponds to the shift of the voltage-dependence of the intrinsic  
 233 steady-state inactivation of the blocked channels to more negative potentials. However, this shift  
 234 of the intrinsic steady-state inactivation of the blocked channels does not affect the observable  
 235 steady-state availability curve because ranolazine should unbind from the channel before the  
 236 channel becomes available for opening. Thus, the recovery from the inactivation of the drug-free  
 237 channels remains unaltered and it is independent from the recovery of blocked channels, which  
 238 is mainly determined by ranolazine unbinding. We tested possible effects of this mechanism on  
 239 the overall channel behavior and found that even a 10-fold increase of the inactivation rate of  
 240 the ranolazine-blocked channel has minimal effect on the position of the observable steady-  
 241 state availability curve obtained using standard voltage-clamp protocol (results not shown).  
 242 However, such increase in the inactivation rate of the blocked channels shifts voltage-  
 243 dependence of ranolazine unbinding to more negative voltages. We found that 5-fold increase  
 244 of inactivation rate of ranolazine-blocked channels, which is equivalent to 10.5 mV shift of  
 245 intrinsic availability curve, places the voltage dependence of the tonic block in the voltage range  
 246 observed experimentally. Thus, the value of the factor  $\gamma$  in the scheme above was set to 5.0.

247  
 248 **Expressions describing ranolazine interaction with the sodium channel at sub-threshold**  
 249 **potentials according to the scheme on Supplemental Figure 3 (excluding transient**  
 250 **binding to the fully open state)**

251  
 252 The rate of ranolazine binding as a function of voltage

$$253 \text{ RateF}(V) = \frac{\delta \cdot k_a \cdot P_{\infty}(V)}{1 + P_{\infty}(V) \cdot \text{HH}(V)} \quad (18)$$

254 where  $\delta$  is a fraction of pre-open state accessible for ranolazine,  $k_a$  is the kinetic binding rate for  
 255 the fully accessible binding site ( $3 \mu\text{M}^{-1}\text{s}^{-1}$ ),  $P_{\infty}(V)$  is defined in eq.(11) and  $\text{HH}(V)$  is defined in  
 256 eq.(6).

257  
 258 The rate of ranolazine unbinding as a function of voltage

$$259 \text{ RateR}(V) = \frac{\delta \cdot u_a}{1 + \gamma \cdot \text{HH}(V)} \quad (19)$$

260 where  $u_a$  is the kinetic unbinding rate for the fully accessible binding site ( $6 \text{ s}^{-1}$ ),  $\gamma$  is the factor,  
 261 which reflects increase of the inactivation rate due to drug binding, and  $\text{HH}(V)$  is the exponent  
 262 defined in eq.(6).

263  
 264 Using the rates define above, the effective  $K_D(V)$  can be calculated as

$$265 K_{D,\text{eff}}(V) = \frac{\text{RateR}(V)}{\text{RateF}(V)} = \frac{K_D}{P_{\infty}(V)} \cdot \frac{1 + P_{\infty}(V) \cdot \text{HH}(V)}{1 + \gamma \cdot \text{HH}(V)} \quad (20)$$

266 where  $K_D = u_a / k_a$  reflects ranolazine binding to the fully accessible binding site ( $2 \mu\text{M}$ ),  $P_{\infty}(V)$  is  
 267 the steady-state probability of the pre-open state, defined in eq.(11), and  $\text{HH}(V)$  is the exponent  
 268 defined in eq.(6). Note that  $K_{D,\text{eff}}$  increases at very negative potentials inversely proportional to  
 269 the fraction of channels in the pre-open state.

270



271 Kinetic rates of interaction of other antiarrhythmic drugs at 15°C.  
 272

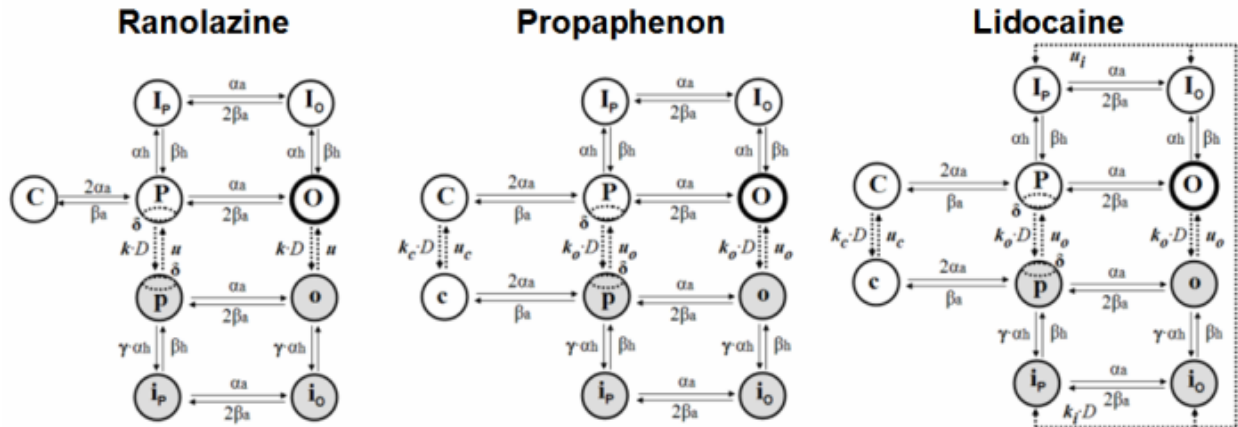

273 **Supplemental Figure 4.** Schemes of ranolazine, propafenone, and lidocaine interactions with sodium  
 274 channels. Kinetic rates are shown in Table 1. The same values of the trapping/guarding coefficient  $\delta =$   
 275  $3/14$  and the factor describing effect of a drug on intrinsic inactivation of blocked channels  $\gamma = 5$  were  
 276 used for all three antiarrhythmic drugs.  
 277

278  
 279 Supplemental Figure 4 shows Markov schemes of drug-channel interactions for three  
 280 sub-classes of sodium channel blockers. Ranolazine interacts exclusively with pre-open/open  
 281 states, is trapped in inactivated state, and prevents activation gates from closing at negative  
 282 potentials. Propafenone predominantly interacts with pre-open/open states, is trapped by  
 283 inactivation gate, and trapped by closed activation gates at negative voltages, interacting with  
 284 the closed state with a very low rate. For illustrative purposes we disregarded possible  
 285 interaction of propafenone with inactivated state of the sodium channel as described by Edrich  
 286 et al. (9) Lidocaine interacts with all channel states and corresponding kinetic rates of  
 287 interaction decrease in the following order: pre-open/open – inactivated – closed.  
 288

289 **Supplemental Table 1.** Kinetic rates of antiarrhythmic drug interaction with different states of  
 290 the sodium channel that were used to simulate block development (15°C)  
 291

| Channel state | Kinetic rates & $K_D$                       | Ranolazine | Propafenone | Lidocaine |
|---------------|---------------------------------------------|------------|-------------|-----------|
| Open          | $k_o$ ( $\mu\text{M}^{-1}\text{sec}^{-1}$ ) | 3.0        | 25.0        | 1.4       |
|               | $u_o$ ( $\text{sec}^{-1}$ )                 | 6.0        | 12.0        | 40.0      |
|               | $K_D$ ( $\mu\text{M}$ )                     | 2.0        | 0.48        | 28.5      |
| Closed        | $k_c$ ( $\mu\text{M}^{-1}\text{sec}^{-1}$ ) | –          | 0.001       | 0.0007    |
|               | $u_c$ ( $\text{sec}^{-1}$ )                 | –          | 0.090       | 1.0       |
|               | $K_D$ ( $\mu\text{M}$ )                     | –          | 90.0        | 1500.0    |
| Inactivated   | $k_i$ ( $\mu\text{M}^{-1}\text{sec}^{-1}$ ) | –          | –           | 0.036     |
|               | $u_i$ ( $\text{sec}^{-1}$ )                 | –          | –           | 0.67      |
|               | $K_D$ ( $\mu\text{M}$ )                     | –          | –           | 18.6      |

292  
 293 Kinetic rates for ranolazine interaction with the sodium channel were obtained in this study.  
 294 Kinetic rates for lidocaine and propafenone were adopted from other publications. (9, 21, 23)  
 295 Corresponding values for kinetic rates at 37°C were obtained using  $Q_{10} = 1.65$  for both kinetic  
 296 binding and unbinding rate that leaves  $K_D$  values unaffected by temperature.  
 297

#### 298 **Kinetic rates of interaction of antiarrhythmic drugs at 37°C.**

299 Our experimental study (see Figure 5 C & D in the main paper) of the development of  
 300 the sodium channel block during pulse trains at 37°C did not permit direct calculations of kinetic  
 301 rate constants at body temperature due to extremely fast block rate ( $\lambda \approx 1.5$  or smaller). Such  
 302 fast block rate makes exponential fits unreliable and very sensitive to the peak current at the 2<sup>nd</sup>  
 303 pulse. Lowering ranolazine concentration can be used to decrease the rate of block  
 304 development. However, low concentration results in a smaller steady-state block that hampers  
 305 reliability of the exponential fit. Instead, an appropriate  $Q_{10}$  for ranolazine interaction with the  
 306 sodium channel was found by using a non-linear procedure to minimize the error of fit to the  
 307 experimentally obtained data. We constrained the fit by choosing the same  $Q_{10}$  for both kinetic  
 308 binding and unbinding rates. This constraint is in agreement with data obtained by Makielski et  
 309 al. (13) for the temperature dependence of lidocaine interaction with the sodium channel. We  
 310 found that the best fit can be obtained using  $Q_{10} = 1.65$ , which corresponds to approximately 3-  
 311 fold increase in both kinetic rates between 15°C and 37°C. This value of  $Q_{10}$  is somewhat higher  
 312 than  $Q_{10}=1.3$  for diffusion (11), but smaller than  $Q_{10} = 2.6$  that can be calculated from the  
 313 lidocaine data. (13)

314  
 315

316 **Time-course of pre-open/open states and inactivated state simulated using action**  
 317 **potential clamp in atrial and ventricular cells.**

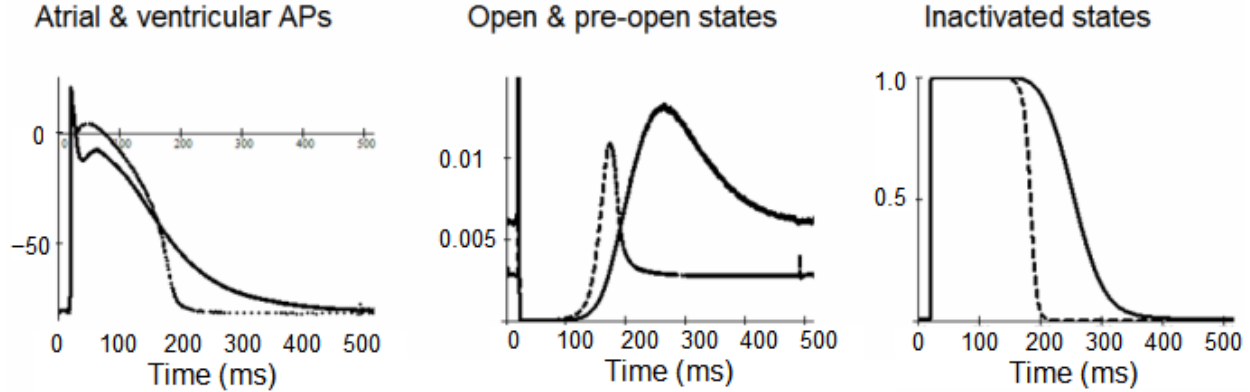

318  
 319  
 320 **Supplemental Figure 5.** Left panel: Shapes of ventricular (dashed line) and atrial (solid line) action  
 321 potentials used in AP-clamp simulations. The time course of pre-open/open states (**middle** panel) and  
 322 inactivated state (**right** panel) of ventricular and atrial sodium channels when corresponding shape of AP  
 323 was used as a command potential. During the upstroke of the action potential, a large fraction of channels  
 324 promptly opens and then inactivate following the path  $C \Rightarrow P \Rightarrow O \Rightarrow I_O$ . The open probability O reaches  
 325 the peak  $\approx 0.6 - 0.8$ , and open channels inactivate within 2 ms, as indicated by initial spike in the middle  
 326 panel, which is outside the vertical range. During repolarization, channels slowly recover from inactivation  
 327 via  $I_P \Rightarrow P$  pathway, which is reflected in the second slow peak in the middle panel.

328  
 329 **Implementation of Markovian sodium channel model**

330  
 331 Model equations were solved using a 2<sup>nd</sup> order Runge-Kutta algorithm in MathCad2001  
 332 environment running on a personal computer equipped with Intel Xeon CPU 3.00 GHz with 2 Gb  
 333 of RAM.  
 334

335  
336  
337  
338

### Supplementary Data

#### Normal sodium channel gating.

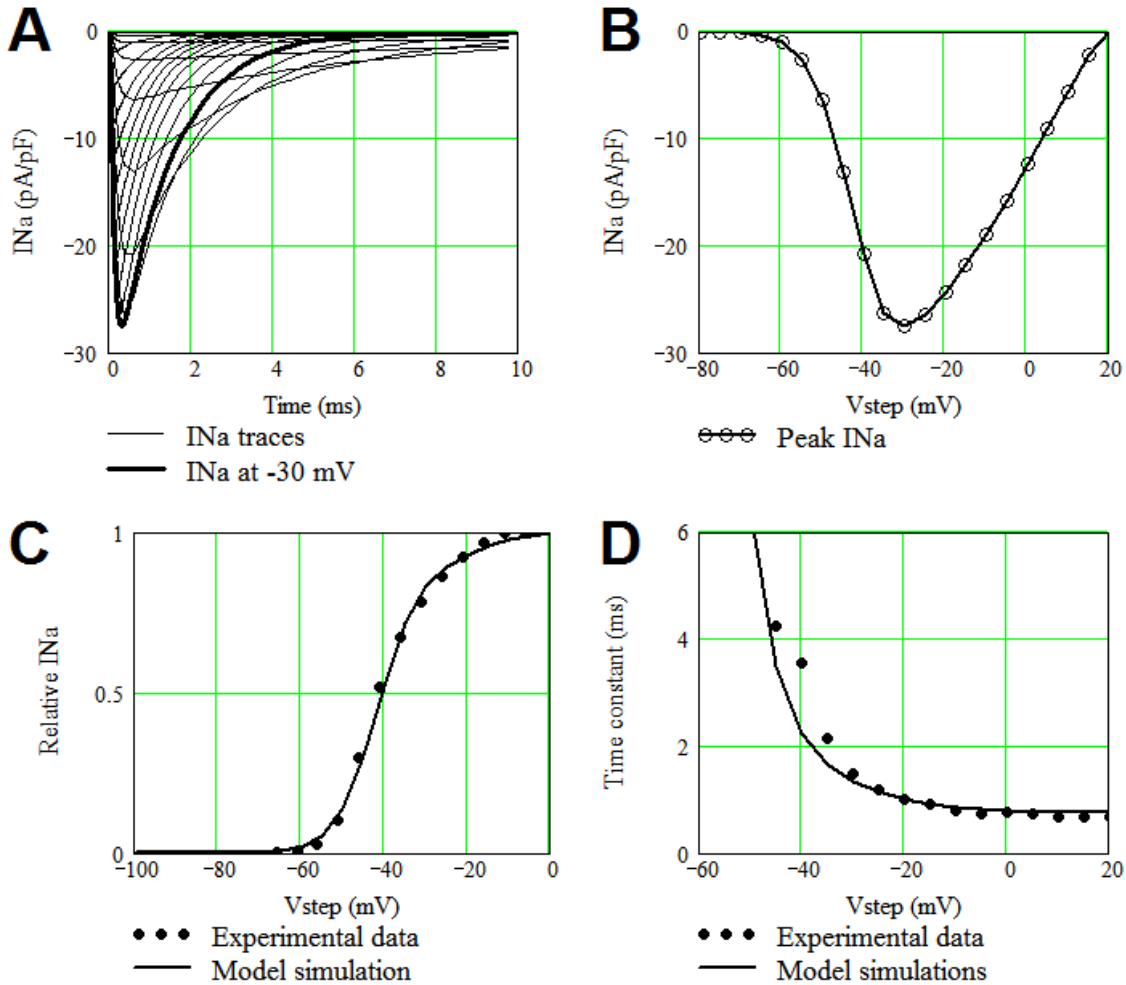

339  
340  
341  
342  
343  
344  
345  
346  
347  
348  
349  
350  
351

**Supplemental Figure 6.** Properties of the **ventricular** sodium channel model at 15°C. **Panel A:** current traces simulated for steps to potentials between -80 and +20 mV from holding potential = -140 mV. Thick trace corresponds to the step to -30 mV. **Panel B:** I-V relations for the peak  $I_{Na}$  obtained during this voltage protocol. **Panel C:** steady-state activation curve obtained from I-V curve divided by linear driving force  $V-E_{Na}$  (solid line) compared with experimentally determined steady-state activation in the same conditions (circles). **Panel D:** Voltage-dependence of the inactivation time constant obtained using mono-exponential fits to the simulated current traces above (solid line) as compared with experimentally obtained inactivation time constant (circles). Model data (solid lines in C and D) are in good agreement with experimental data (circles).

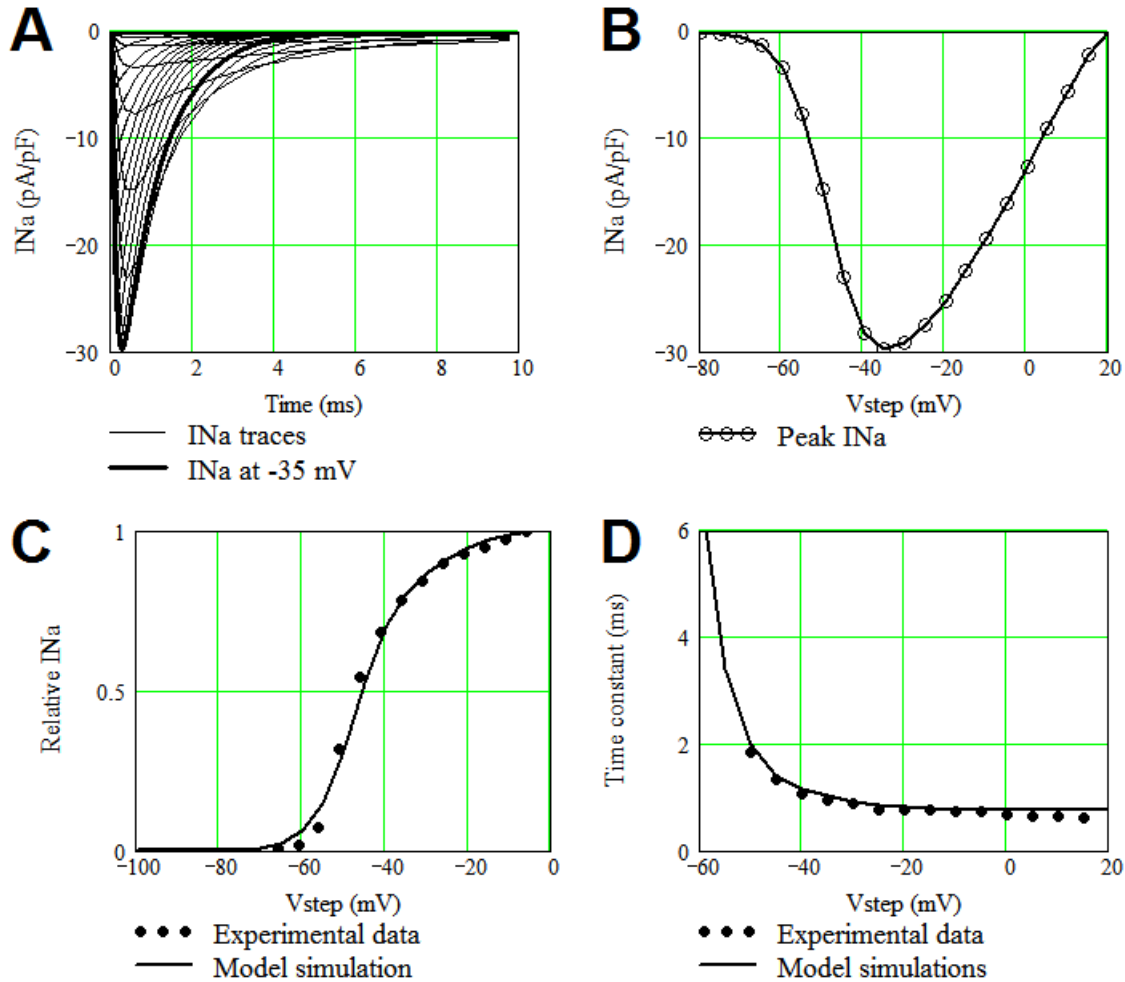

352  
353  
354  
355  
356  
357  
358  
359  
360  
361

**Supplemental Figure 7.** Properties of the atrial sodium channel model at 15°C. See Supplemental Figure 6 for panel description. Note that in atrial cells sodium current inactivates faster than in ventricular cells (0.92 msec vs. 1.36 msec at  $-30$  mV) and the steady-state activation is shifted by 5 mV to more negative potentials. The maximum of the I-V curve is also shifted by the same amount. Model data (solid lines in C and D) are in good agreement with experimental data (circles).

362 Behavior of the simulated fast sodium current was tested against common experimental  
363 protocols. For simulations, we used the voltage-clamp protocol identical to that used in  
364 experimental studies. Voltage steps were delivered from holding potential of  $-140$  mV to  
365 potentials between  $-80$  mV and  $+20$  mV in 5 mV increments. Duration of voltage step was 300  
366 msec with 100 msec between steps. Concentrations of  $Na^+$  ions in extracellular solution (10  
367 mM) and inside the cell (5 mM) were chosen to reflect experimental conditions. With these  
368 concentrations reversal potential was  $E_{Na} = 18.1$  mV. Figures 6A and 7A show simulated  $I_{Na}$   
369 traces in ventricular (6A) and atrial (7A) myocytes. Figures 6B and 7B shows current-voltage  
370 relations for the simulated peak  $I_{Na}$  for the two cell types. Comparison of simulated (solid lines)  
371 and experimental (circles) steady-state activations for two tissue types are shown on Figures 6C  
372 (ventricular cell) and Figure 7C (atrial cell). Fit of Boltzman function to simulated ventricular data  
373 yields  $V_{1/2} = -39.9$  mV and slope = 6.0 mV, while Boltzman fit to experimental data yields  $V_{1/2} =$   
374  $-40.13$  mV and slope = 6.3 mV. Same analysis of atrial data yields  $V_{1/2} = -44.7$  mV and slope =  
6.6 mV for simulated data and  $V_{1/2} = -45.2$  mV and slope = 6.5 mV for experimental data. Note

375 that in order to make analysis of simulated data identical to the analysis of experimental data we  
 376 calculated the steady-state activation by dividing the peak  $I_{Na}$  by  $(V - E_{Na})$  for both simulated  
 377 and experimental data even while  $I_{Na}$  was simulated using Goldman-Katz expression for the  
 378 maximal conductance (see Methods). Figures 6D and 7D compare simulated and  
 379 experimentally observed inactivation time constants. Note good agreement of simulated values  
 380 and experimental data.  
 381

382 **Intrinsic and observable steady-state availability curves for inactivation coupled with**  
 383 **activation. Steady-state open and pre-open states (“window”).**  
 384

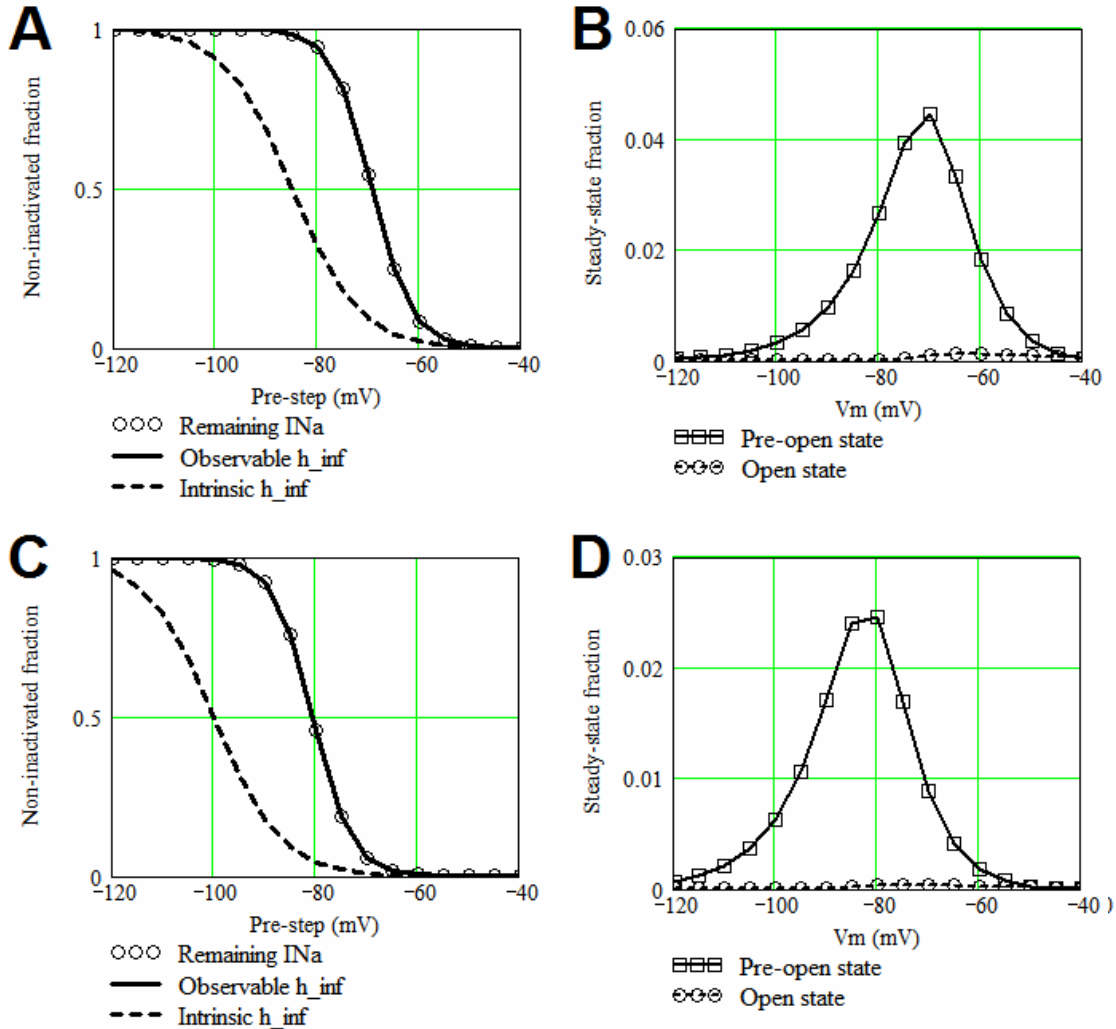

385 **Supplemental Figure 8.** Panels A and B illustrate simulated behavior of the ventricular sodium current  
 386 model. Panels C and D – atrial sodium channel model. **Panels A and C:** Circles depict simulated steady-  
 387 state inactivation obtained using the standard inactivation protocol and calculated as the decrease of the  
 388 peak sodium current recorded at  $-30$  mV after 1000 ms prepulse to the indicated potentials. Solid lines  
 389 were obtained using the theoretical “observable” steady-state inactivation (equation 12). Dashed lines  
 390 indicate the intrinsic voltage dependence of the steady-state inactivation (equation 7) that were set in the  
 391 models to have  $V_h = -85$  mV for ventricular and  $V_h = -100$  mV for atrial model. Observable curves are  
 392 characterized by  $V_h = -69.3$  mV, slope =  $-3.9$  mV (ventricular model) and by  $V_h = -80.6$  mV, slope =  
 393  $-3.8$  mV (atrial model). The difference of 11 mV between half-inactivation points in ventricular and atrial  
 394 models are in the typical range (10-13 mV) observed experimentally in these cell types. **Panels B and D:**  
 395  
 396

397 Steady-state probabilities of the pre-open state (squares) and open state (circles) as a function of  
 398 potential in ventricular (B) and atrial (D) cells. These values were obtained at the end of 1000-msec test  
 399 steps to corresponding potentials. Steady-state open probability results in non-inactivating window current  
 400 that peaks at  $-62.0$  mV in ventricular cells and at  $-74.4$  mV in atrial cells. However, maximal open  
 401 probability in this window of potentials is very small (0.13% in ventricular cells and 0.04% in atrial cells).  
 402 On the other hand, the peak of the window pre-open probability is 30–60 times larger (4.6% in ventricular  
 403 cells and 2.6% in atrial cells). Note that the magnitude of the steady-state pre-open probability determines  
 404 the rate of ranolazine binding to the sodium channel, not the amount of block. As a result of these  
 405 differences, unbinding of ranolazine from the sodium channel at moderately depolarized potentials below  
 406 activation threshold is slower in atrial cells, leading to larger accumulation of block between voltage steps  
 407 or action potentials.  
 408

409 **Development of the sodium channel inactivation in control and development of block in**  
 410 **the presence of 15  $\mu$ M ranolazine during the standard inactivation protocol.**  
 411

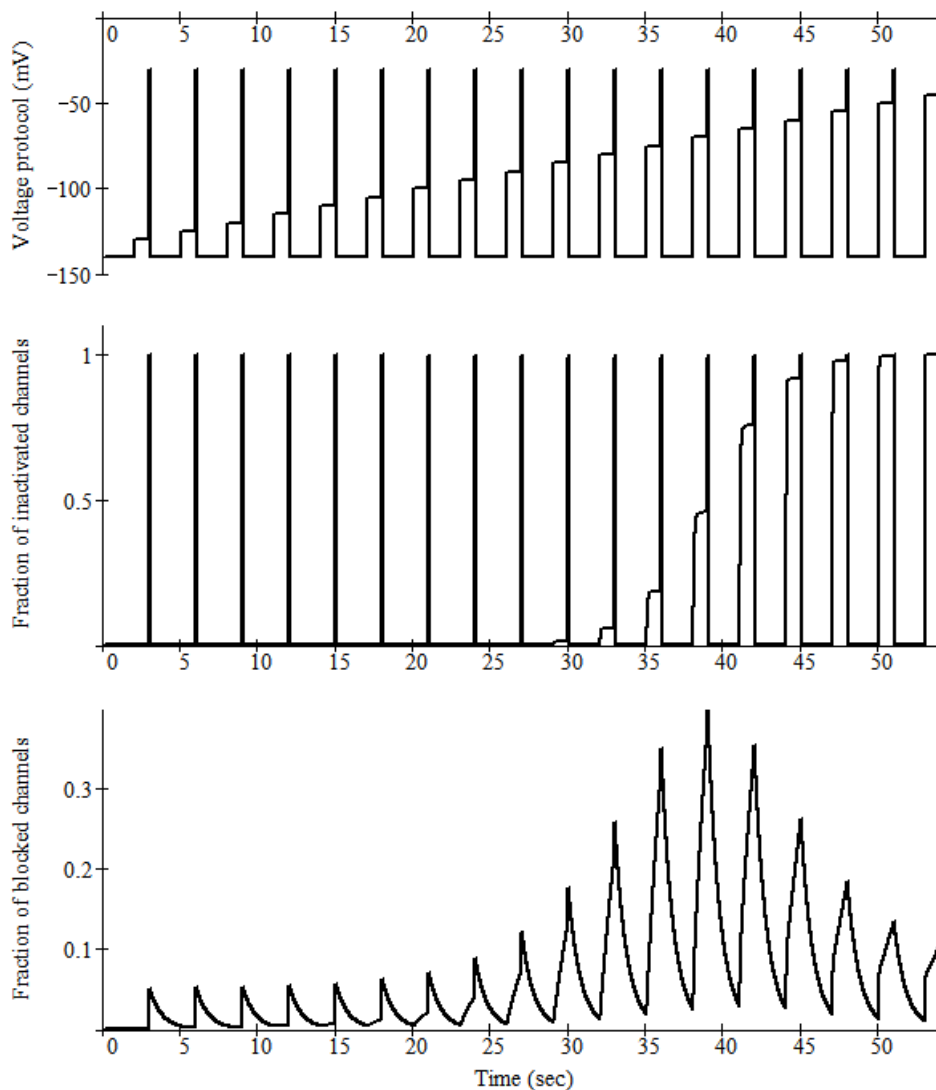

412  
 413  
 414 **Supplemental Figure 9.** Standard steady-state inactivation protocol used to obtain the steady-state  
 415 availability curve. Cell potential was set to  $-140$  mV for 2 seconds followed by a conditioning pulse for  
 416 950 msec and the test pulse to  $-30$  mV for 50 msec. Conditioning steps were delivered between  $-130$   
 417 mV and  $-45$  mV with 5 mV increments. Complete voltage protocol is shown on the upper panel. Middle

418 panel shows time-dependent changes of the fraction of inactivated channels in the absence of ranolazine.  
 419 Note that 950 msec conditioning step is long enough to attain steady-state inactivation at all voltages.  
 420 Bottom panel shows the time-dependent changes of the fraction of blocked channels during the same  
 421 voltage-clamp protocol in the presence of 15  $\mu\text{M}$  ranolazine. The block is far from the equilibrium,  
 422 especially at more positive voltages.

423  
 424 Supplemental Figure 9 illustrates that standard protocol routinely used to obtain the  
 425 steady-state inactivation curve is well suited for that purpose in our model. Conditioning pulse  
 426  $\sim 1000$  msec duration to any voltage is long enough for the inactivation process to attain a  
 427 steady-state value. However, in the presence of ranolazine the fraction of blocked channels is  
 428 far from its steady-state value for most except very negative potentials. As a result, channel  
 429 availability curve obtained using this protocol does not reflect equilibrium conditions. It is  
 430 commonly assumed (a misconception) that 2-3 seconds is enough for any drug to equilibrate  
 431 with the channel binding site. In case of ranolazine, this time is enough to reach the steady-state  
 432 block at negative potentials, but the block is far from the steady-state at more positive  
 433 potentials. This is the cause of a shallower slope of the steady-state availability curve (shifted in  
 434 the presence of ranolazine). Similar effect is typically reported for other antiarrhythmic drugs.

435  
 436 **Effect of pre-pulse duration on the shift of the steady-state availability curve.**

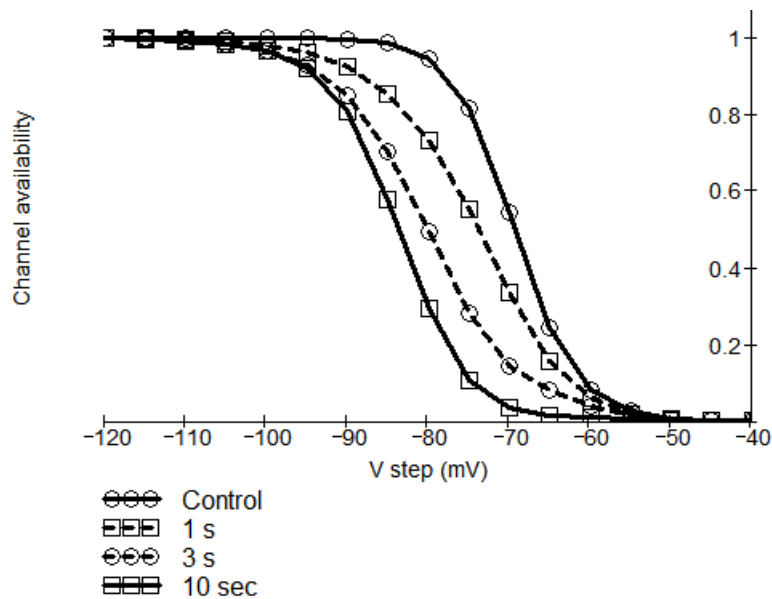

439  
 440 **Supplemental Figure 10.** Effect of prepulse duration on the position and slope of the steady-state  
 441 availability curve in the presence of 15  $\mu\text{M}$  ranolazine. Ventricular model only for illustrative purposes.  
 442 Curve labels are shown below the plot.  
 443  
 444

445 The steady-state channel availability curves on Supplemental Figure 10 were obtained using the  
 446 same voltage protocol, as shown on Supplemental Figure 9 (top panel). Curves were obtained  
 447 in control conditions and in the presence of 15  $\mu\text{M}$  ranolazine. Standard protocol, which is  
 448 widely used in these types of experiments, has pre-step duration of 1 s. The simulated channel  
 449 availability curve is shifted to more negative voltages and becomes less steep. The shift  
 450 becomes larger when pre-step duration is increased to 2 s. However, the true equilibrium  
 451 binding at all pre-step potentials can be achieved only for the pre-pulse duration of 10 s or



452 longer. Note, that the steady-state availability curve obtained using 10 s pre-steps has the same  
 453 slope as the control curve.

454

455 **Shift of the steady-state availability curve in the presence of ranolazine.**

456

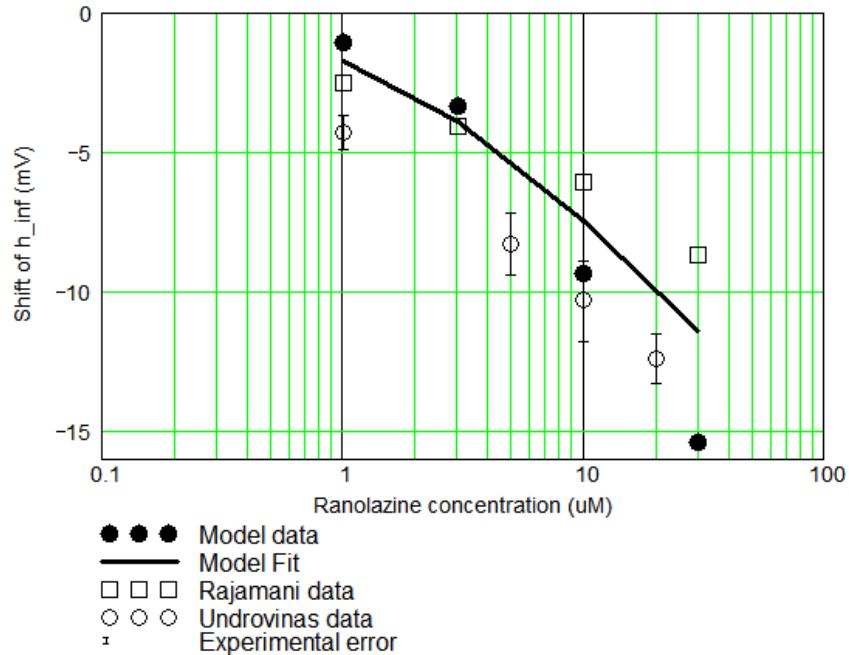

457

458 **Supplemental Figure 11.** This figure illustrates the shift of the steady-state availability curve obtained  
 459 experimentally by Undrovinas et al. (24) (open circles with error bars) and by Rajamani (unpublished,  
 460 open squares) in the presence of 10 μM ranolazine. Corresponding model predictions are shown as filled  
 461 circles. The solid line represent the best fit to the simulated data using Bean's equation. (1)

462

463 Previous studies suggested that ranolazine is an inactivated state blocker without  
 464 providing proper experimental evidence. The only published evidence for the inactivated state  
 465 block by ranolazine is the shift of the steady-state availability curves in the presence of  
 466 ranolazine. Bean's equation used for the shift analysis was developed specifically to describe  
 467 lidocaine (an inactivated state blocker) effect on the steady-state availability curve. It employs  
 468 only two channel states (closed and inactivated) and excludes any transient state (both pre-  
 469 open and open). This shift, predicted by the Bean's equation (1) sometimes is erroneously  
 470 interpreted as a true change in channel gating, while the authors themselves indicated that the  
 471 observed shift of the availability curve is due to channel's block by lidocaine. Such a block  
 472 makes an additional fraction of the channels unavailable upon subsequent step to test potential.  
 473 We have previously described the mechanism of the parallel shift of the steady-state availability  
 474 curve by inactivated state blockers.

475

476 The best fit using Bean's equation to the model simulated data yields  $K_{Dr} > 1$  mM and  
 477  $K_{Da} = 1.8$  μM. Corresponding fit to Rajamani et al data gives  $K_{Dr} = 9.4$  μM and  $K_{Da} = 1.8$  μM. Fit  
 478 to Undrovinas et al data results in  $K_{Dr} = 7.4$  μM and  $K_{Da} = 1.2$  μM. Note that both simulations  
 479 and Rajamani experiments were obtained for the fast sodium current, while Undrovinas et al.  
 480 did not observe any shift of the steady-state availability curve using the fast sodium current and  
 481 reported the shift for the late sodium current. Our data indicate that ranolazine shifts the steady-  
 482 state availability curve obtained for the fast sodium current. Thus, there is a discrepancy  
 between experimental data, which cannot be accounted in our model.

483 Our experimental data directly probed ranolazine interaction with the inactivated state.  
 484 We tested effect of the duration of time that channel spends in the inactivated state on the  
 485 block. Results indicate that the duration of the voltage step to  $-30$  mV where channels spend  
 486 most of the time in inactivated state (after transient opening) has no effect on the block. Our  
 487 model showed that the block of the sodium channels by ranolazine via interaction with pre-  
 488 open/open states affects the channel availability curve by shifting it to more negative potentials  
 489 and decreasing the slope. (22)

490 Thus, our choice of the model (interaction with pre-open state instead of inactivated  
 491 state) was not based on our arbitrary model selection, but was dictated by experimental  
 492 observations.

493 Indirect evidence in favor of ranolazine interaction with pre-open/open state(s) as  
 494 opposed to inactivated state can be deduced from the well-established fact that ranolazine  
 495 preferentially blocks the late (slow) INa and accelerates the current decay. It is commonly  
 496 assumed that the late sodium current is a result of impaired inactivation when channels briefly  
 497 close to some other state (not the traditional inactivated state), while closing into the inactivated  
 498 state halts the bursting behavior (i.e. inactivated state is “absorbing”). An inactivated state  
 499 blocker blocks channel after it is inactivated. However, these inactivated channels already have  
 500 no contribution to the late current. Therefore, their block would not affect the time-course of the  
 501 current trace, so that the sensitivity of the fast and late current to an inactivated state blocker  
 502 will be similar.

503 **Influence of the slow sodium channel inactivation on apparent  $K_D$ .**

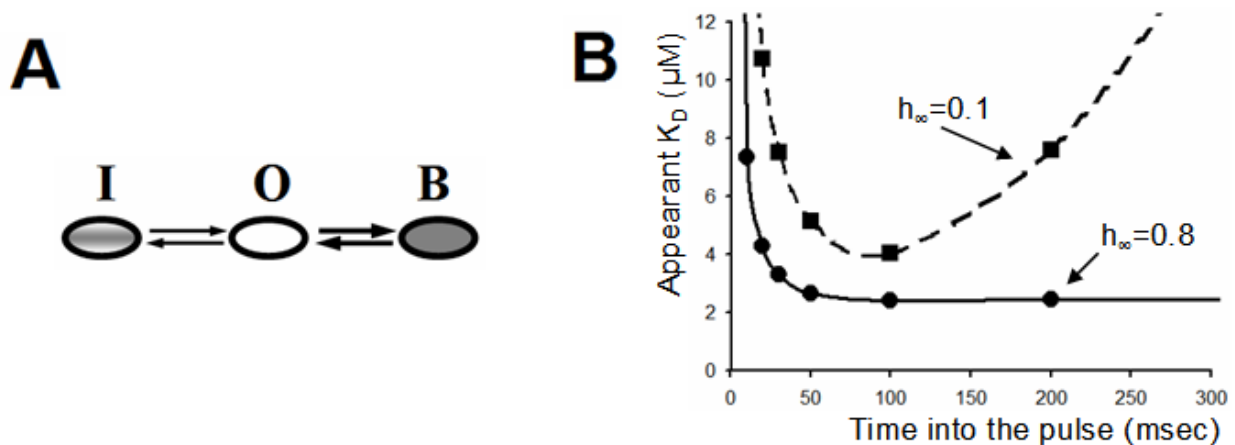

507 **Supplemental Figure 12.** Panel A shows a *minimal* scheme illustrating the competition between  
 508 inactivation and block when rates of both processes have comparable magnitude. Dependence of  
 509 apparent  $K_D$  on the time into the trace, obtained using the minimal scheme is shown in **panel B**. Block  
 510 was calculated as a relative current decrease compared with control current at different times into current  
 511 trace. Solid line with circles illustrates apparent  $K_D$  for ranolazine block of current inactivating with  $\tau = 50$   
 512 ms and large non-inactivating component of 80%. Apparent  $K_D$  at 50 msec into the trace is 2.4  $\mu\text{M}$ .  
 513 Dashed line illustrates results simulated for current inactivating with  $\tau = 100$  ms and much smaller non-  
 514 inactivated component of 10%. Apparent  $K_D$  at 200 msec into the trace is 7.6  $\mu\text{M}$ .  
 515  
 516

517 Figure 12A shows the model scheme of competition between channel inactivation and  
 518 ranolazine binding, which assumes that the rates of inactivation and drug binding are  
 519 comparable so that inactivation cannot be considered as being at instant equilibrium. This  
 520 assumption is probably valid for the slow or late sodium current, which inactivates with the time  
 521 constant on the order of hundreds milliseconds. In this case, block develops during

522 depolarization and the amount of block depends on the time into the depolarizing step, when  
523 block is assessed. Interaction of ranolazine with the resting slow/late channels will be the same  
524 as is observed for the fast sodium channels, because the same channels are responsible for  
525 both fast and late sodium current. Figure 12B shows that the apparent  $K_D$  for drug block varies  
526 as a function of time into the trace because slowly inactivating channels spend most of the time  
527 during the pulse to positive potentials in the open state, which is fully available for the ranolazine  
528 binding. Obviously, when the dose-response curve is obtained for the peak inward current,  
529 block has very little time to develop and a very large concentration of ranolazine is necessary to  
530 substantially decrease this peak. As two curves in Figure 12B show, the dependence of the  
531 apparent  $K_D$  on the time into the trace is influenced by other parameters that characterize the  
532 inactivation process. When the maximal steady-state non-inactivating current is large ( $\tau_h = 50$   
533 ms;  $h_\infty = 0.8$ ), the apparent  $K_D$  attains a constant value of  $2.5 \mu\text{M}$ , which is equal to the true  $K_D$   
534 of  $2 \mu\text{M}$  divided by  $h_\infty$ . When the current does not inactivate ( $h_\infty = 1.0$ ), the apparent  $K_D$   
535 becomes the true  $K_D$ . Conversely, when the current shows substantial inactivation with time ( $\tau_h$   
536 =  $100 \text{ ms}$ ;  $h_\infty = 0.1$ ), the apparent  $K_D$  attains some minimal value well above the true  $K_D$  then  
537 increases again at longer times. This effect is due to recovery of blocked channels, so that they  
538 transiently become conducting (open) before final inactivation. In a sense, blocked channels  
539 “feed” the open state late into the pulse when both inactivation and the blocking processes are  
540 almost complete. Note that when the block of the slow current with these characteristics is  
541 measured at  $200 \text{ ms}$  the predicted apparent  $K_D \approx 7.6 \mu\text{M}$  is in agreement with  $K_D$  obtained  
542 experimentally in canine ventricular myocytes (Zygmunt, unpublished data, 2009 and (24)). This  
543 effect is further enhanced when inactivated state is absorbing and channels do not recover from  
544 inactivation at all ( $h_\infty = 0.0$ ). In these conditions, all channels eventually end up in the inactivated  
545 state and no channels will remain in the blocked state. Theoretical analysis of the competition  
546 between inactivation and block can be found elsewhere.(10)

547  
548

549 **Effect of holding potential on the tonic block and on the rate and the steady-state use-**  
 550 **dependent block by ranolazine.**  
 551

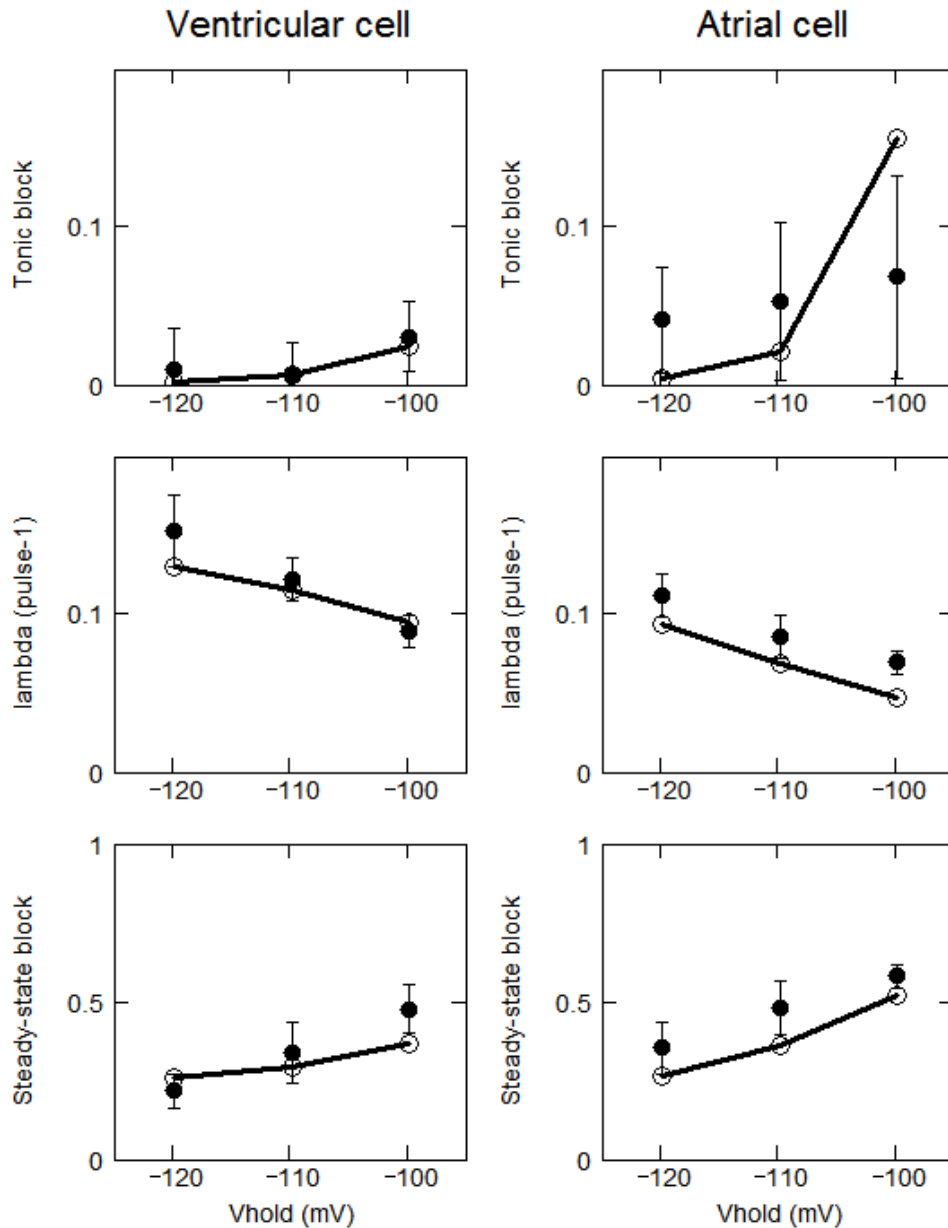

552 **Supplemental Figure 13.** Effect of holding potential (-120, -110, and -100 mV) on parameters of block  
 553 by 10  $\mu$ M ranolazine at 15°C in the two cell types. Comparisons of simulations (solid lines with open  
 554 circles) and experimental data (solid circles with S.D. bars). **Panel A** shows tonic block in ventricular (left)  
 555 and atrial (right) cells obtained during 50-msec pulse to -30 mV after 10 sec rest at corresponding holding  
 556 potentials as compared with control current. **Panel B** shows the rate of block development ( $\lambda$  in pulses<sup>-1</sup>)  
 557 during the same pulse train protocols in ventricular (left) and atrial (right) cells. **Panel C** shows steady-  
 558 state block attained when the same pulses were repeated 40 times with diastolic interval of 100 msec.  
 559 Results of simulations are in good agreement with experimental data.  
 560  
 561  
 562

563 Supplemental Figure 13 illustrate good agreement between the tonic block, the rate of  
 564 block development, and the steady-state block obtained experimentally during voltage-clamp

565 pulse trains at 15°C at different holding potentials and corresponding values simulated by the  
566 model. Note that these sets of experimental data were not used to calculate kinetic rate  
567 constants for ranolazine interaction with the sodium channel. Such a comparison serves as an  
568 independent verification of the accuracy of calculated kinetic rates of ranolazine interaction with  
569 the sodium channel and the overall accuracy of our model.

570

571 **Effect of the action potential waveform on the sodium channel block development.**

572

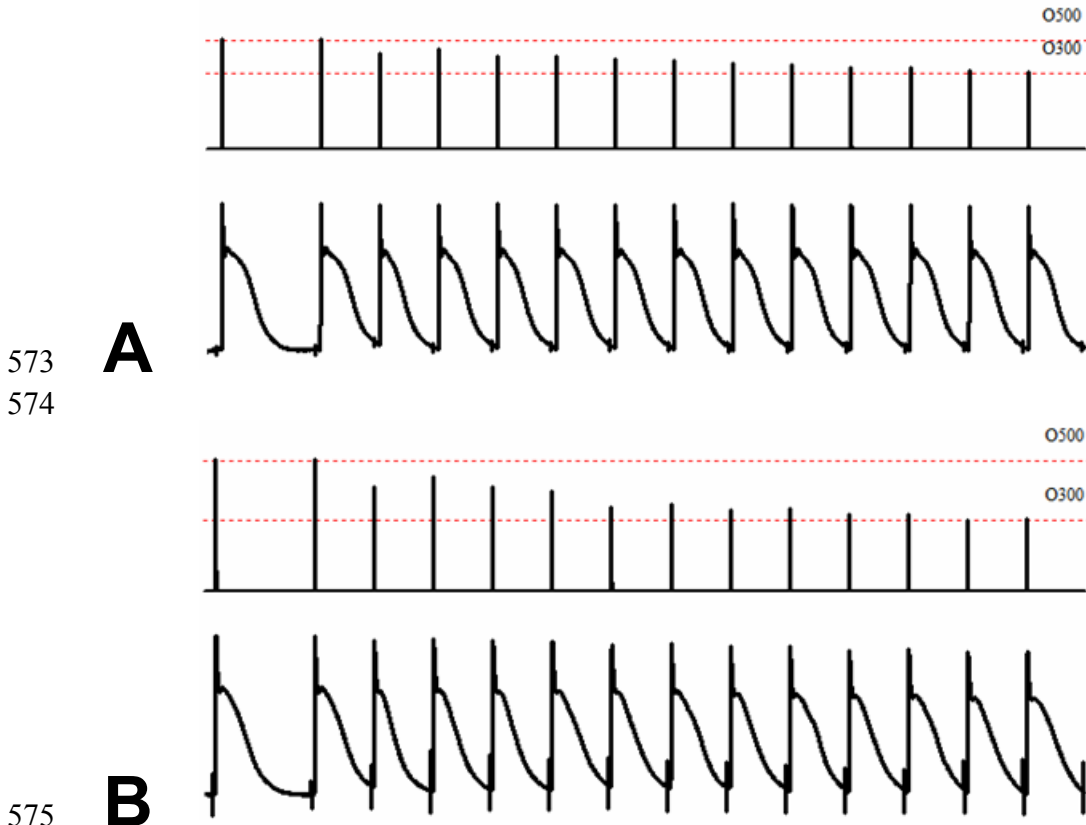

576

577

578

579

580

581

582

583

584

585

**Supplemental Figure 14.** These simulations were performed using AP trains recorded experimentally when BCL was shortened from 500 ms (first 2 APs) to 300 ms. A: AP train recorded in control. B: AP train recorded in the presence of 10  $\mu$ M ranolazine (shown on Fig.6C in the main manuscript). Using the train of APs recorded in control, the model predicts the Vmax ratio (300 ms/500 ms) of 69.7% (30.3% additional block). When the train of APs recorded in the presence of 10  $\mu$ M ranolazine had been used, this ratio was 54.5% (45.5% additional block). Thus, the prolongation of the terminal phase of the atrial action potential increases the amount of block by 50%.

586 **Block development during the time course of an action potential.**  
 587

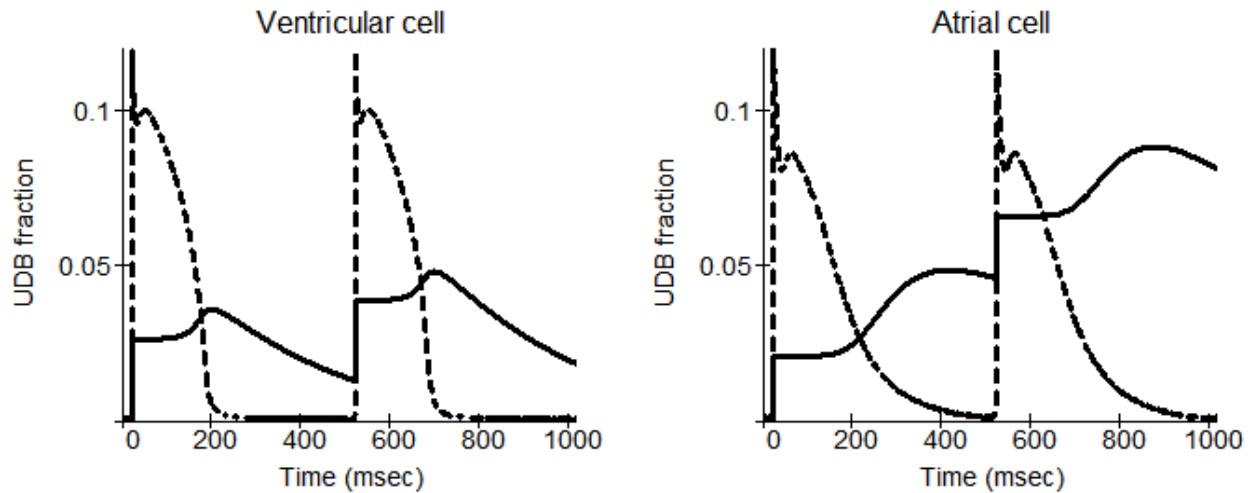

588  
 589  
 590 **Supplemental Figure 15.** Development of the sodium channel blockade during the train of the applied  
 591 action potential using ventricular (left) and atrial (right) sodium channel model in the presence of 10  $\mu\text{M}$   
 592 ranolazine. Dashed lines show action potential clamp waveforms used for these simulations. These  
 593 traces illustrate block development during the initial two applied APs (shown on Figure 8C in the main  
 594 text) at expanded time scale.  
 595

596 This Figure shows that the sodium channel block accumulation during an action potential  
 597 in the presence of ranolazine has two distinct components: (1) a very fast block due to  
 598 ranolazine binding to the fully open channels during AP upstroke, and (2) a relatively slow block  
 599 during phase 3 of the action potential due to ranolazine binding to the channels in the pre-open  
 600 state, i.e. to the channels that have already recovered from inactivation, but not all activation  
 601 gates are closed yet. The rate of block depends on the fraction of channels in accessible state.  
 602 The fraction of open channels during upstroke is very large. However, channels spend only a  
 603 few milliseconds in this state before inactivation. This limits the total block accumulation during  
 604 AP upstroke to a fraction of the equilibrium block. On the other hand, only a small fraction of  
 605 channels, which recover from inactivation during repolarization, do not promptly enter the fully  
 606 closed state. However, channels spend in this state much longer time ranging from tens to  
 607 hundreds milliseconds. The slow repolarization rate of the atrial action potential provides much  
 608 longer time for ranolazine to interact with the sodium channels recovering from inactivation into  
 609 pre-open state.  
 610

611  
 612 **The choice of the experimental data used for comparison with the model predictions**  
 613

#### 614 **Wang et al (25) data**

615  
 616 Wang et al (25) used three different sodium channel isoforms, including cardiac rNav1.5-  
 617 WCW. They showed that ranolazine interaction with the sodium channel is similar for all these  
 618 isoforms. Unfortunately, the authors did not present traces of the slow rNav1.5-WCW block by  
 619 ranolazine, probably, because they unexpectedly found that ranolazine at low concentrations  
 620 increases the slow rNav1.5-WCW current recorded at 50 ms into the trace. The authors  
 621 provided no explanation for this observation, which may reflect competition between inactivation  
 622 and ranolazine binding (see Supplementary Figure 12 above) or may be an experimental

623 artifact. For this reason we used traces obtained using inactivation-deficient rNav1.4-WCW  
624 (Fig.6 in (25)) for comparison with model simulations.

625

626 ***Rajamani et al (16) data***

627

628 **Slow INa:** Figure 1 in (16) shows current traces recorded in HEK293 cells expressing  
629 WT and a “non-inactivating” R1623Q mutant sodium channel. However, the R1623Q mutant  
630 displays a considerable inactivation. A double exponential fit to the trace presented on their  
631 Figure 1 shows two time constants: 3.01 ms and 11.37 ms with relative amplitudes 86% and  
632 11%. The same double exponential fit to a control trace on their Figure 2B gives similar time  
633 constants: 3.46 ms and 9.83 ms with the relative amplitudes 71% and 25%. This behavior can  
634 hardly be described as “non-inactivating INa.” In our model, we used the inactivation time  
635 constant for the slow INa close to 200 ms, which is within the range of the late INa inactivation  
636 time constants obtained in our laboratory and other studies. The small amplitude of the sodium  
637 current at 50 ms into the trace (their Figure 3) makes it very difficult to reliably measure the  
638 amount of slow INa block by ranolazine. For these reasons, we found it impossible to compare  
639 these experimental results with the model predictions for slow sodium current block by  
640 ranolazine.

641

642 **Peak INa:** The main result of Rajamani et al paper (16) – the concentration dependence  
643 of fast and late INa block by ranolazine at different pulse frequencies – is presented on Figures  
644 2 in (16). These results show that slow INa is more sensitive to ranolazine than peak INa. Our  
645 model reproduces this difference in sensitivity. According to the model prediction (see the main  
646 manuscript), the apparent  $K_D$  for the slow INa block by ranolazine is 5.2  $\mu\text{M}$ , which is close to  
647  $IC_{50}$  values obtained by Rajamani et al (7.45  $\mu\text{M}$ ) and by Undrovinas et al (6.46  $\mu\text{M}$ ). However,  
648 our model cannot reproduce results shown in their Figure 3 – the time course of the block  
649 development during pulse trains. There is a large linear component of the use-dependent block  
650 development, which fails to reach the steady-state after 40 pulses. We observed similar  
651 behavior in our experiments using HEK293 cells expressing WT  $\alpha$ - and  $\beta$ -subunits (see Figure  
652 1D in our accompanying experimental paper). However, when we adjusted Na concentrations to  
653 record outward INa at the same step potential (Figure 1C in our accompanying paper), the block  
654 development followed an exponential time course, as observed in all studies using cardiac  
655 myocytes independent of a blocker. Similarly, Wang et al (25) used the outward INa to  
656 characterize use-dependent block of several sodium channel isoforms expressed in HEK293  
657 cell and found exponential block development without any linear component (see their Figures 3  
658 and 4). Note that the use-dependent block development should always have a mono-  
659 exponential course for all possible binding schemes. This stems from the fact that during each  
660 pulse the same fraction of block of the drug-free channels is attained due to repetition of the  
661 same voltage pattern during train of pulses (voltage clamp steps or action potentials.) This  
662 process is a first order reaction and it is described by the mono-exponential function. We  
663 attributed the difference in the block development for inward and outward currents to the Na ion  
664 accumulation in the former case due to a relatively small size of HEK293 cells. Correspondingly,  
665 our model cannot reproduce results shown on their Figure 2, which were obtained from the  
666 measurements as shown on their Figure 3.

667

668 ***Shift of the steady-state availability curve for peak INa***

669

670 Rajamani et al (16) found that the steady-state availability curve is shifted in the  
671 presence of 10  $\mu\text{M}$  ranolazine by 11.5 mV (their Figure 4 and Table 2). On the other hand,  
672 Undrovinas et al.(24) found no shift of the steady-state availability curve for peak INa in the  
673 presence of 20  $\mu\text{M}$  ranolazine. Thus, the model predictions of the shift of the steady-state

673 availability curve by 3 mV (atrial cells) or 5 mV (ventricular cells) in the presence of 15  $\mu$ M  
674 ranolazine falls between these experimental values and is in agreement with our experimental  
675 findings (see Figure 2 and corresponding discussion in the main paper).

676

677 **Undrovinas et al (24) data:**

678

679 **Dissociation constants:** Using block of the late INa in myocytes from the failing canine  
680 heart Undrovinas et al (24) showed that ranolazine blocks late sodium channel at negative  
681 potentials (resting state block) with  $K_{Dr} = 7.42 \mu$ M and at positive step potentials (presumably,  
682 inactivated state block) with  $K_{Di} = 1.17 \mu$ M. On the other hand, these authors (14, 15) showed  
683 that the same sodium channels are responsible for both fast and late sodium currents.  
684 Therefore, 10  $\mu$ M of ranolazine will produce a very substantial block of the sodium channel  
685 independent of the channel state. The well established fact that ranolazine at 10  $\mu$ M has very  
686 little effect on the fast sodium current is difficult to reconcile without questioning the validity of  
687 the method used to calculate above  $K_D$ 's.

688

689 As we already discussed above (see Supplemental Figure 11 and corresponding text)  
690 Undrovinas et al.(24) employed Bean's equation (1) to calculate  $K_D$ 's, However, this equation is  
691 valid only when the channel is in the equilibrium state at a given potential and there are no  
692 transient states. Thus, it is not applicable when a drug has strong interaction with the transient  
693 state(s) of the channel, such as pre-open or open states, which promptly disappear in  
694 equilibrium conditions. Our experimental data (see accompanying experimental paper) provide  
695 direct evidence that ranolazine does not interact with the equilibrium state of the sodium  
696 channel, which dominates at positive potentials (the inactivated state). Based on this  
697 experimental evidence, we excluded ranolazine interaction with the inactivated state of the  
698 sodium channel from our numerical model. Results of our simulations indicate that all  
699 experimental data, including the shift of the steady-state availability curve, can be explained by  
700 ranolazine interaction with pre-open and open states of the sodium channel (Supplementary  
701 Figure 11).

701

702 **Late INa:** Our simulations showed similar high sensitivity of the slow sodium current to  
703 ranolazine as was obtained by Undrovinas et al. The numerical discrepancy between  $K_D$  values  
704 can be explained by the interaction between inactivation and block as illustrated on  
705 Supplemental Figure 13. In addition we found that the time constants of the late sodium current  
706 inactivation both in control and under ranolazine provided on their Figure 5A do not correspond  
707 to the values that we obtained by the double exponential fits to the experimental curves shown  
708 on the same Figure. We found slow time constants to be 960 ms and 630 ms.

708

709 We modified our slow sodium current description to mimic the inactivation rate constant  
710 reported by Undrovinas et al (470 ms in control conditions). Supplemental Figure 16 compares  
711 experimental data presented in (24) with the model simulation.

711

712



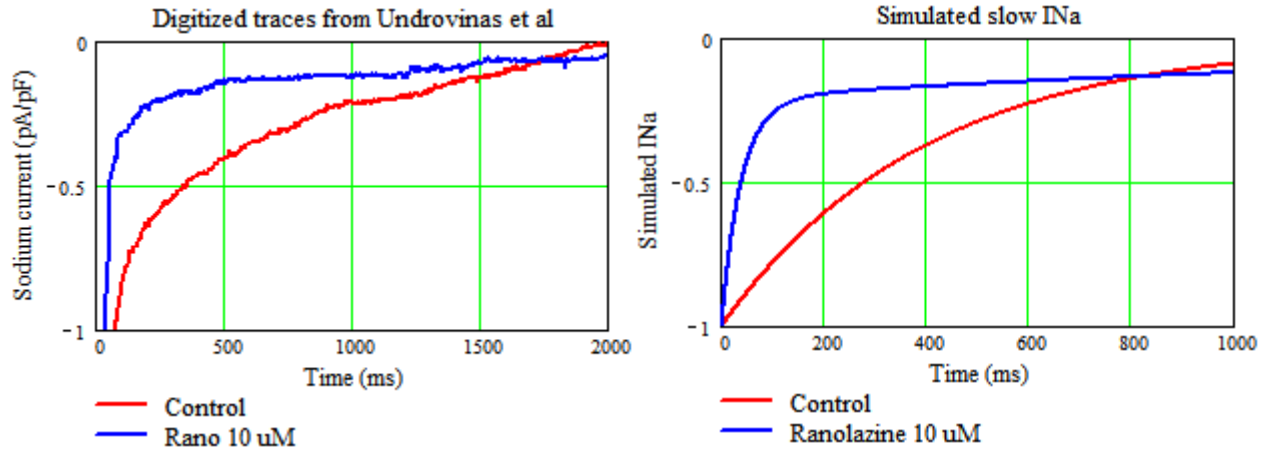

713  
 714 **Supplemental Figure 16.** Traces re-digitized from the Figure 5A in (24) (**left**) and the model simulations  
 715 assuming the inactivation time constant of 470 ms in control (**right**). The slow sodium current trace  
 716 simulated in the presence of ranolazine is better fitted with the double exponential function. Vertical scale  
 717 for the digitized traces from (24) was decreased from 2 pA/pF to 1 pA/pF in order to emphasize the late  
 718 current decay. Note the crossover of the two simulated current traces, which is similar to experimental  
 719 finding. This effect is due to the fast block of open channels at the beginning of the trace that followed by  
 720 a continuous recovery of non-inactivated blocked channels, which are subsequently inactivated (later in  
 721 the trace, not visible).  
 722

723  
724  
725  
726  
727  
728  
729  
730  
731  
732  
733  
734  
735  
736  
737  
738  
739  
740  
741  
742  
743  
744  
745  
746  
747  
748  
749  
750  
751  
752  
753  
754  
755  
756  
757  
758  
759  
760  
761  
762  
763  
764  
765  
766

### Supplemental Reference List

1. **Bean BP, Cohen CJ, Tsien RW.** Lidocaine block of cardiac sodium channels. *J Gen Physiol* 81: 613-642, 1983.
2. **Bennett PB, Valenzuela C, Chen LQ, Kallen RG.** On the molecular nature of the lidocaine receptor of cardiac Na<sup>+</sup> channels. Modification of block by alterations in the alpha-subunit III-IV interdomain. *Circ Res* 77: 584-592, 1995.
3. **Cha A, Ruben PC, George AL, Jr., Fujimoto E, Bezanilla F.** Voltage sensors in domains III and IV, but not I and II, are immobilized by Na<sup>+</sup> channel fast inactivation. *Neuron* 22: 73-87, 1999.
4. **Chanda B, Bezanilla F.** Tracking voltage-dependent conformational changes in skeletal muscle sodium channel during activation. *J Gen Physiol* 120: 629-645, 2002.
5. **Clancy CE, Rudy Y.** Linking a genetic defect to its cellular phenotype in a cardiac arrhythmia. *Nature* 400: 566-569, 1999.
6. **Clancy CE, Zhu ZI, Rudy Y.** Pharmacogenetics and anti-arrhythmic drug therapy: a theoretical investigation. *Am J Physiol Heart Circ Physiol* 292: H66-H75, 2007.
7. **Colatsky TJ.** Voltage clamp measurements of sodium channel properties in rabbit cardiac Purkinje fibres. *J Physiol* 305: 215-234, 1980.
8. **Dumaine R, Towbin JA, Brugada P, Vatta M, Nesterenko DV, Nesterenko VV, Brugada J, Brugada R, Antzelevitch C.** Ionic mechanisms responsible for the electrocardiographic phenotype of the Brugada syndrome are temperature dependent. *Circ Res* 85: 803-809, 1999.
9. **Edrich T, Wang SY, Wang GK.** State-dependent block of human cardiac hNav1.5 sodium channels by propafenone. *J Membr Biol* 207: 35-43, 2005.
10. **Gilliam FR, Starmer CF, Grant AO.** Blockade of rabbit atrial sodium channels by lidocaine. Characterization of continuous and frequency-dependent blocking. *Circ Res* 65: 723-739, 1989.
11. **Hille B.** *Ionic channels of excitable membranes.* Sunderland, MA: Sinauer Associates Inc, 1984.
12. **Kohlhardt M.** Different temperature sensitivity of cardiac Na<sup>+</sup> channels in cell-attached and cell-free conditions. *Am J Physiol* 259: C599-C604, 1990.
13. **Makielski JC, Falleroni MJ.** Temperature dependence of sodium current block by lidocaine in cardiac Purkinje cells. *Am J Physiol* 260: H681-H689, 1991.
14. **Maltsev VA, Kyle JJ, Mishra S, Undrovinas AA.** Molecular identity of the late sodium current in adult dog cardiomyocytes identified by Na<sub>v</sub>1.5-antisense inhibition. *Am J Physiol Heart Circ Physiol* H667-H676, 2008.
15. **Maltsev VA, Kyle JW, Undrovinas A.** Late Na<sup>+</sup> current produced by human cardiac Na<sup>+</sup> channel isoform Na<sub>v</sub>1.5 is modulated by its b<sub>1</sub> subunit. *J Physiol Sci* 59: 217-225, 2009.
16. **Rajamani S, El-Bizri N, Shryock JC, Makielski JC, Belardinelli L.** Use-dependent block of cardiac late Na<sup>+</sup> current by ranolazine. *Heart Rhythm* 6: 1625-1631, 2009.
17. **Sheets MF, Hanck DA.** Voltage-dependent open-state inactivation of cardiac sodium channels: gating current studies with Anthopleurin-A toxin. *J Gen Physiol* 106: 617-640, 1995.

- 767 18. **Sheets MF, Hanck DA.** Molecular action of lidocaine on the voltage sensors of sodium  
768 channels. *J Gen Physiol* 121: 163-175, 2003.
- 769 19. **Sheets MF, Hanck DA.** Outward stabilization of the S4 segments in domains III and IV  
770 enhances lidocaine block of sodium channels. *J Physiol* 582: 317-334, 2007.
- 771 20. **Specialized Information Services USNLoM.** ChemIDplus. NIH.  
772 <http://chem.sis.nlm.nih.gov/chemidplus> [21 Dec. 2010].
- 773 21. **Starmer CF, Grant AO.** Phasic ion channel blockade: a kinetic model and parameter  
774 estimation procedure. *Mol Pharmacol* 28: 348-356, 1985.
- 775 22. **Starmer CF, Nesterenko VV, Gilliam FR, Grant AO.** Use of ionic currents to identify  
776 and estimate parameters in models of channel blockade. *Am J Physiol* 259: H626-H634,  
777 1990.
- 778 23. **Starmer CF, Nesterenko VV, Undrovinas AI, Grant AO, Rosenshtraukh LV.**  
779 Lidocaine blockade of continuously and transiently accessible sites in cardiac sodium  
780 channels. *J Mol Cell Cardiol* 23 (Suppl.1): 73-83, 1991.
- 781 24. **Undrovinas AI, Belardinelli L, Undrovinas NA, Sabbah HN.** Ranolazine improves  
782 abnormal repolarization and contraction in left ventricular myocytes of dogs with heart  
783 failure by inhibiting late sodium current. *J Cardiovasc Electrophysiol* 17: S161-S177,  
784 2006.
- 785 25. **Wang GK, Calderon J, Wang SY.** State- and use-dependent block of muscle  $Na_v1.4$   
786 and neuronal  $Na_v1.7$  voltage-gated  $Na^+$  channel isoforms by ranolazine. *Mol Pharmacol*  
787 73: 940-948, 2008.
- 788
- 789
